# Supplementary material
Source: PubMed Central journal article supplement (PMC1346890)

## Supplemental materials

**Fig.S1. RACK1 enhances specifically IR/IGF1-R-mediated but not EGFR or EGFR-Ros chimeras-mediated STAT3 phosphorylation.** **A.** 293T cells were transfected with 500ng of EGFR, 150ng of STAT3 and 250ng of phEF-RACK1 or phEF-neo. **B.** NIH3T3/EB69 and **C.** NIH3T3/ES2, two stable clones of EGFR-Ros chimeras expressing cells, were transfected with 1  $\mu$ g phEF-RACK1 or phEF-neo. After 24 h, cells were serum-starved for 12 hours and then stimulated with EGF (50 ng/ml) for 15 min or left unstimulated. SDS-PAGE and Western-blotting were similar to that in Fig.1. Results represent one typical experiment from two independent experiments.

**Fig.S2. Detergent and glycerol dependent association between RACK1 and IR.** For the top two panels, HEK293T cells were starved overnight, either left untreated or treated with insulin for 15 minutes; for the bottom two panels, HEK293T cells were transfected with 200 ng of IR. Starvation, stimulation with insulin total cell lysate (TCL) preparation and co-ip were performed as in Fig.1 with the indicated lysis buffer and antibodies, followed by SDS-PAGE and immunoblotting. Results represent one typical experiment from two independent experiments.

**Fig.S3. Overexpression of RACK1 or WD1-4 in HEK293T cells enhances IR-mediated STAT3 activation.** HEK293T cells were transfected with 150ng IR, 150ng STAT3 and 250ng of phEF-RACK1, phEF-WD1-4 or phEF-Neo. 24 hours post-transfection, cells were serum starved overnight, then either left untreated or treated with insulin or 10% FCS for 15 minutes. Cell lysate preparation, SDS-PAGE and immunoblotting were performed as in Fig.1 and analyzed with the indicated antibodies. Results represent one typical experiment from two independent experiments.

**Fig.S4. Triple complex detection of IR, RACK1 and STAT3.** Conditions are as described in Fig.3F. Proteins in 20  $\mu$ l of each fraction were resolved by SDS-PAGE, followed by immunoblotting with the indicated antibodies. Results represent one typical experiment from three independent experiments.

**Fig.S5. Overexpression of RACK1 enhances the abundance of phospho-STAT3 in both cytoplasm and nucleus.** HEK293T cells were transfected with IR, STAT3 and RACK1 or pHEF-Neo, followed by overnight serum starvation, insulin induction for different time periods and isolation of cytoplasmic and nuclear fractionations. 25  $\mu$ g of samples were separated by SDS-PAGE and immunoblotted with the indicated antibodies, with  $\beta$ -tubulin and snRNP as cytoplasmic and nuclear markers, respectively.

**Fig.S6. Protein expression level in PA-1, SKOV3 and SW626 ovarian cancer cells and the effect of RACK1 expression on migration and invasion ability of PA-1 cells.** **A.** PA-1, SW626 and SKOV3 Cell lysates were prepared, followed by Western blotting as indicated. **B.** PA-1 cells were transfected with different plasmids (2 $\mu$ g of RACK1 or pHEF-neo, 1 $\mu$ g of dnSTAT3) as indicated. Migration and invasion assays were performed after 48 hours post transfection supplemented with insulin and IGF-1.

Fig.S1

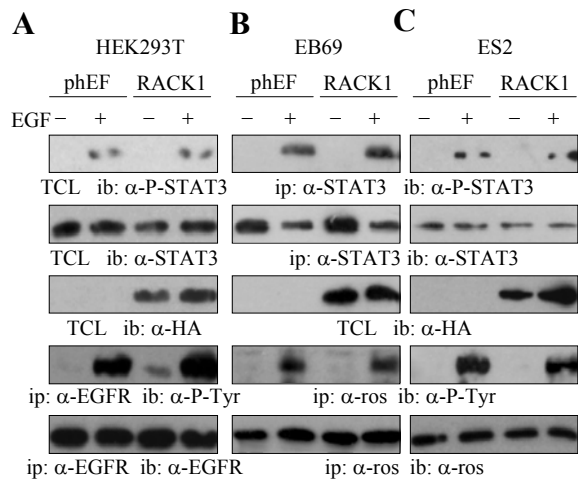

Fig.S2

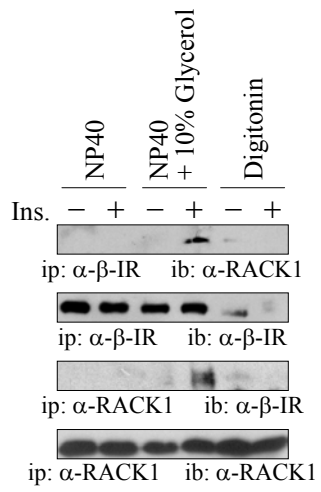

Fig.S3

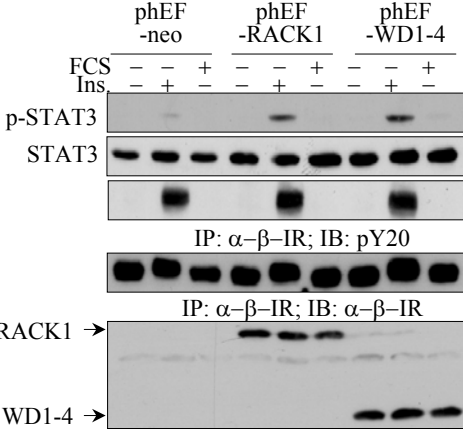

Fig.S4

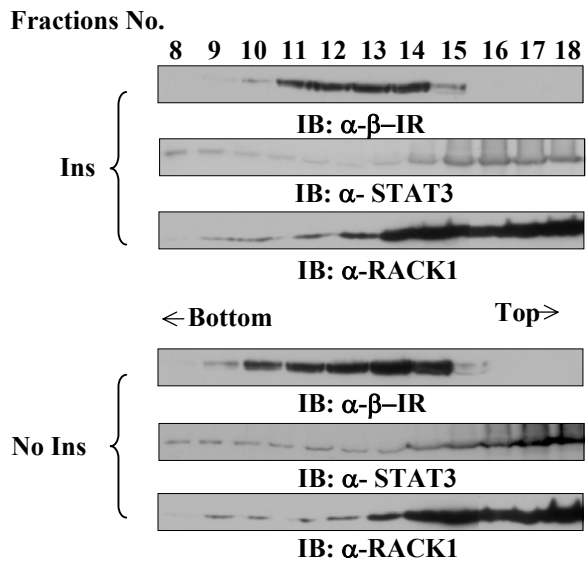

Fig.S5

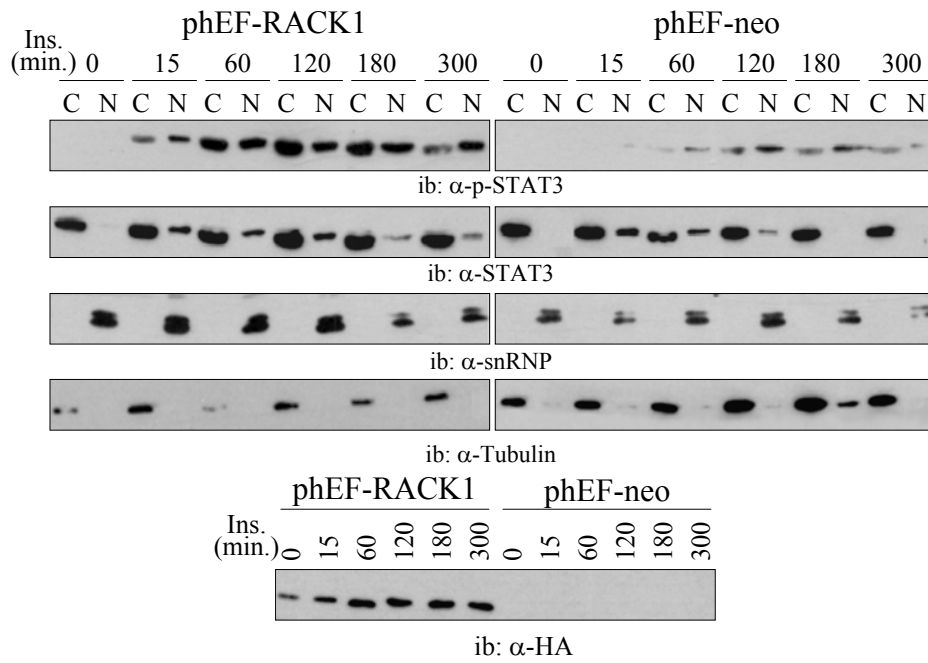

Fig.S6

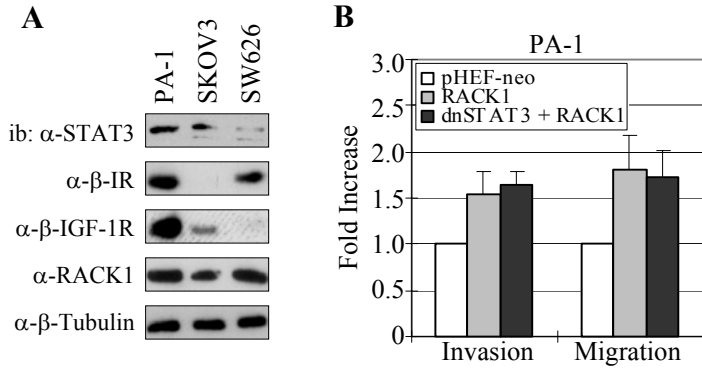

Supplement: molcellb_26_2_413__1.pdf [file molcellb_26_2_413__1.pdf]
